# Supplementary material for: Baseline risk factors associated with immune related adverse events and atezolizumab
Source: PubMed Central journal article supplement (PMC10011463; doi:10.3389/fonc.2023.1138305), 2023-02-28

**Suppl Fig 1:** Cumulative incidence function stratified by study (panels) and treatment arm (color) to estimate the irAE probability (any grade) over time while considering death as a competing event. One separate plot for each irAE type: A) Rash, B) Hepatitis.

### A) Rash

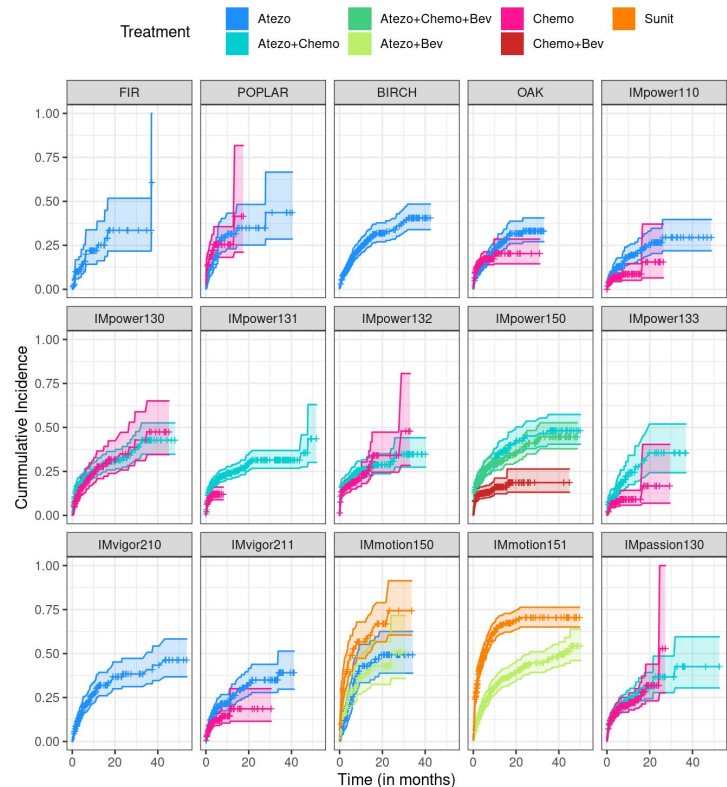

### B) Hepatitis

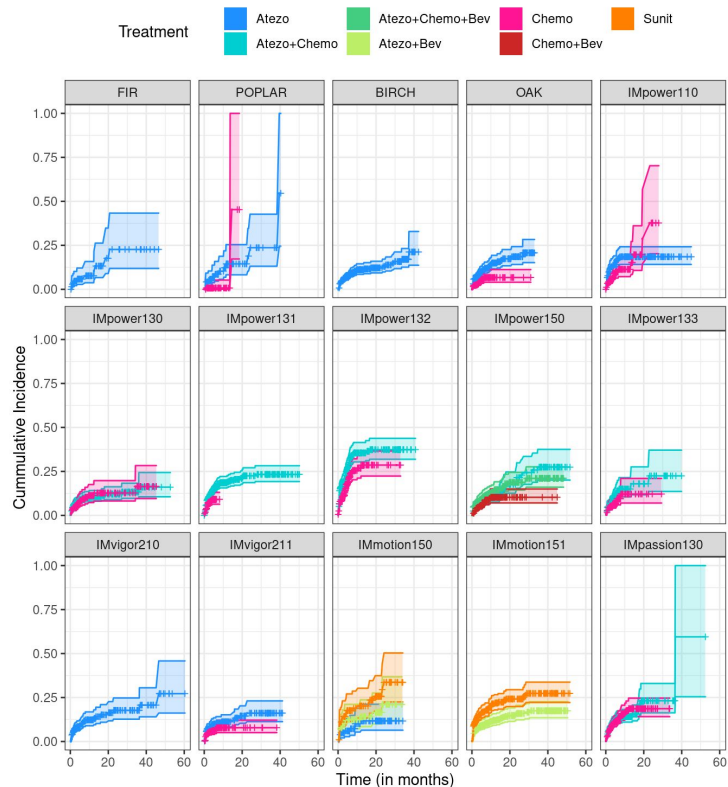

**Suppl Fig 1:** Cumulative incidence function stratified by study (panels) and treatment arm (color) to estimate the irAE probability (any grade) over time while considering death as a competing event. One separate plot for each irAE type: A) Rash, B) Hepatitis, C) Hypothyroidism, D) Hyperthyroidism, E) Pneumonitis.

### C) Hypothyroidism

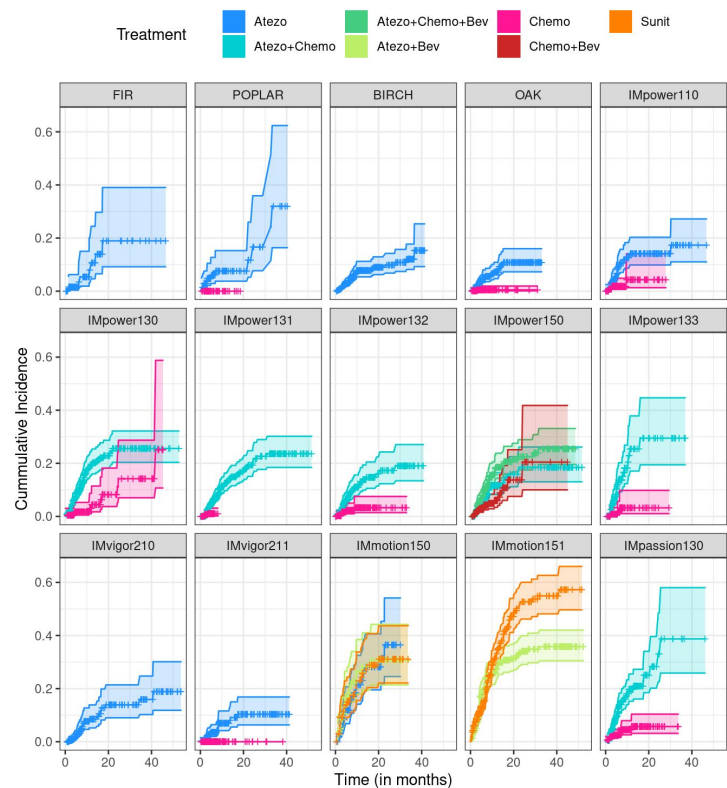

### D) Hyperthyroidism

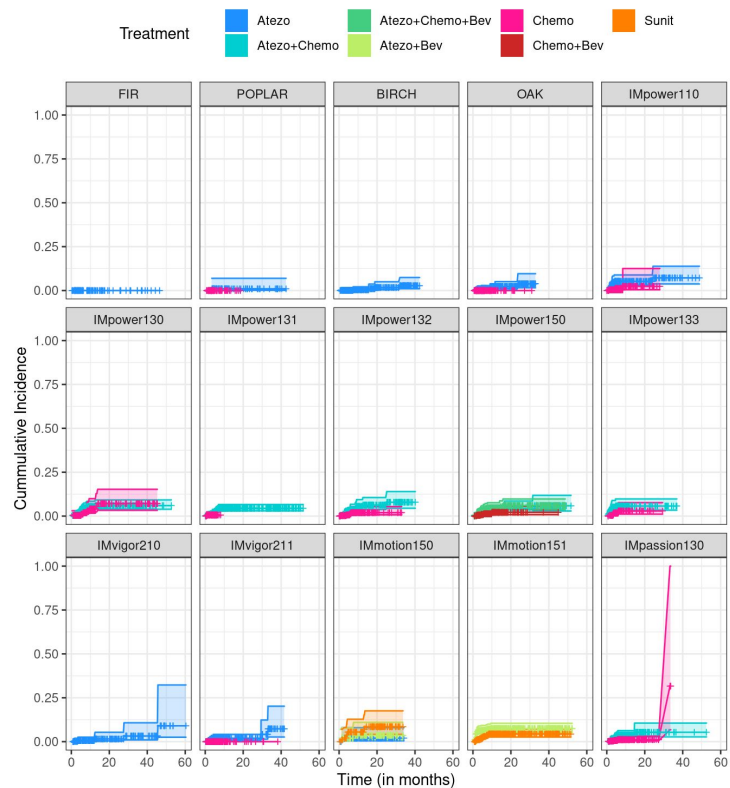

**Suppl Fig 1:** Cumulative incidence function stratified by study (panels) and treatment arm (color) to estimate the irAE probability (any grade) over time while considering death as a competing event. One separate plot for each irAE type: A) Rash, B) Hepatitis, C) Hypothyroidism, D) Hyperthyroidism, E) Pneumonitis.

E) Pneumonitis

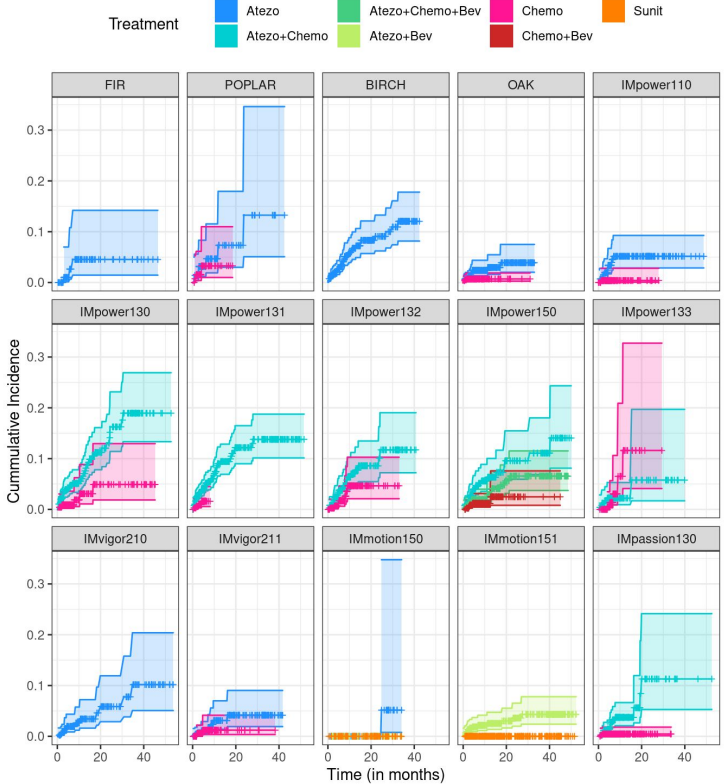

Supplement: Image_1.pdf [file Image_1.pdf]
