# Supplementary material for: Baseline risk factors associated with immune related adverse events and atezolizumab
Source: PubMed Central journal article supplement (PMC10011463; doi:10.3389/fonc.2023.1138305), 2023-02-28

## Association between age and hepatitis

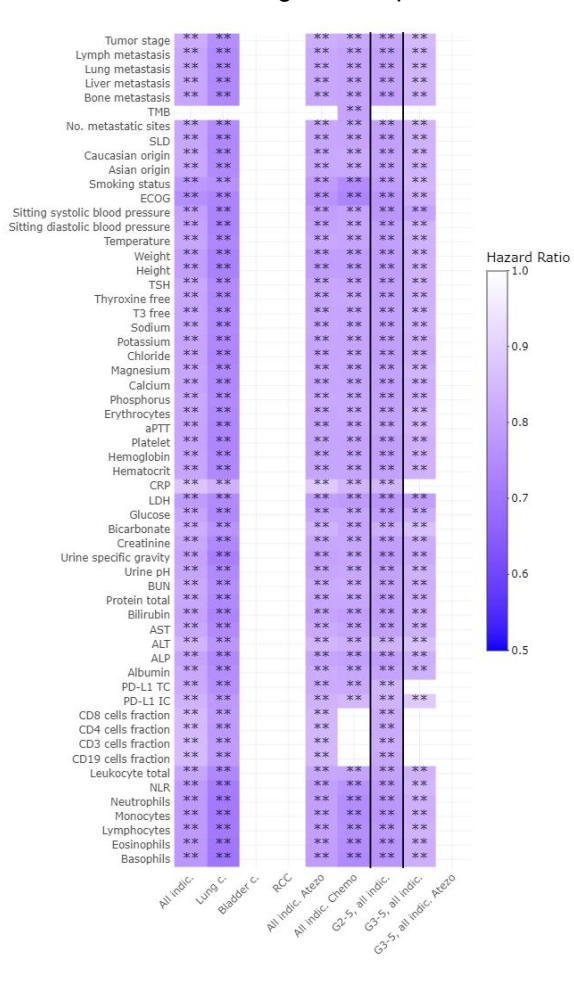

## Association between sex and pneumonitis

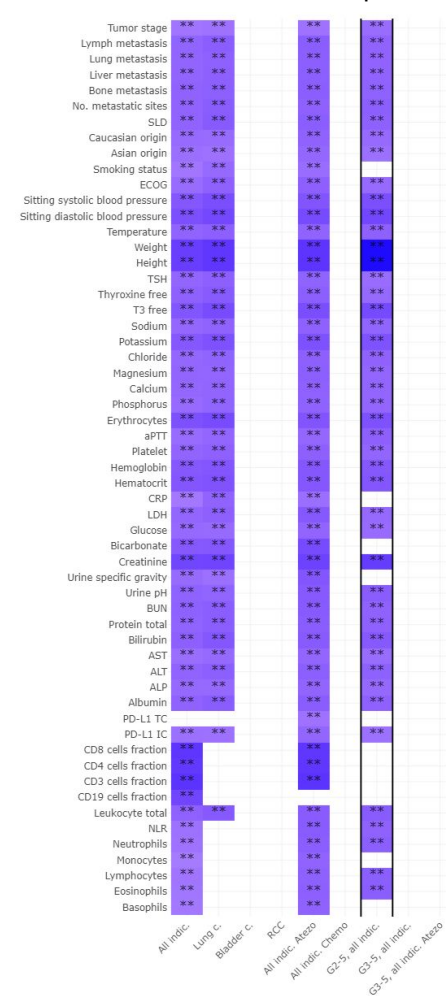

## Association between sex and hypothyroidism

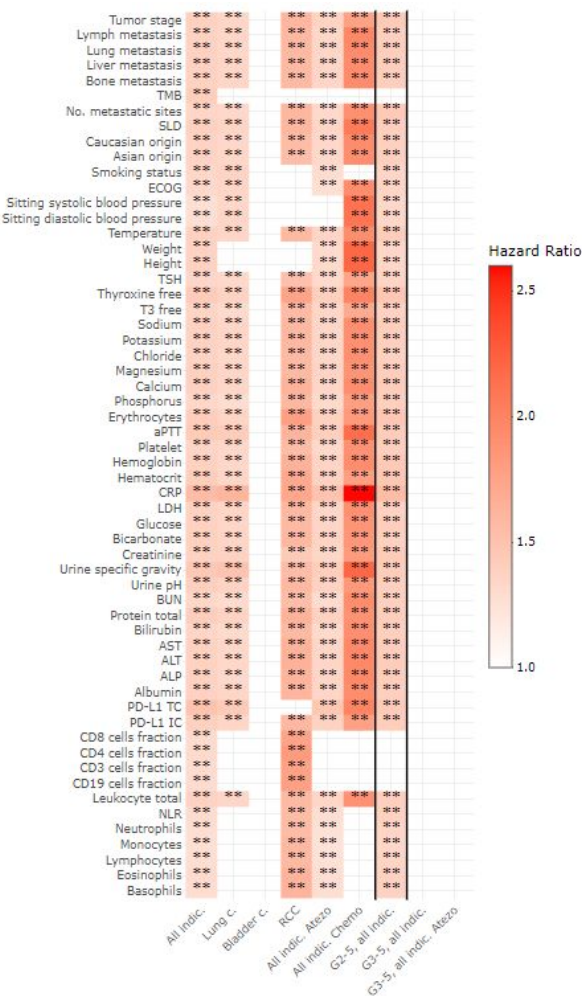

Supplement: Image_2.pdf [file Image_2.pdf]
